# Supplementary material for: COVID-19 progression and convalescence in common variable immunodeficiency patients show dysregulated adaptive immune responses and persistent type I interferon and inflammasome activation
Source: PubMed Central journal article supplement — Nat Commun. 2024 Nov 28;15:10344. doi: 10.1038/s41467-024-54732-x (PMC11605083; doi:10.1038/s41467-024-54732-x), 2024-11-28
Supplement: 41467_2024_54732_MOESM2_ESM.pdf [file 41467_2024_54732_MOESM2_ESM.pdf]

## DESCRIPTION OF ADDITIONAL SUPPLEMENTARY FILES

**Supplementary Data 1.** Clinical data and epidemiology information of all patients.

**Supplementary Data 2.** Cell count per cell type of the single-cell data from the COVID cohort.

**Supplementary Data 3.** Differentially expressed genes per each cell compartment (B cells, T cells, NK cells, and Myeloid cells).

**Supplementary Data 4.** Gene ontology analysis of different immune cell compartments (B cells, T cells, NK cells, and Myeloid cells).

**Supplementary Data 5.** Transcription factor enrichment analysis of Naïve B cells and unswitched memory B cells (US-memory).

**Supplementary Data 6.** Cell-cell communication probabilities calculation.

**Supplementary Data 7.** List of antibodies used for spectral flow cytometry.

**Supplementary Data 8.** Percentages of different cell compartments (B cells, T cells, NK cells, and Myeloid cells) in spectral flow cytometry.

**Supplementary Data 9.** Marker MFI for each cell type by each patient.
