# Supplementary material for: COVID-19 progression and convalescence in common variable immunodeficiency patients show dysregulated adaptive immune responses and persistent type I interferon and inflammasome activation
Source: PubMed Central journal article supplement — Nat Commun. 2024 Nov 28;15:10344. doi: 10.1038/s41467-024-54732-x (PMC11605083; doi:10.1038/s41467-024-54732-x), 2024-11-28
Supplement: 41467_2024_54732_MOESM12_ESM.pdf [file 41467_2024_54732_MOESM12_ESM.pdf]

## Reporting Summary

Nature Portfolio wishes to improve the reproducibility of the work that we publish. This form provides structure for consistency and transparency in reporting. For further information on Nature Portfolio policies, see our [Editorial Policies](#) and the [Editorial Policy Checklist](#).

Please do not complete any field with "not applicable" or n/a. Refer to the help text for what text to use if an item is not relevant to your study.

For final submission: please carefully check your responses for accuracy; you will not be able to make changes later.

### Statistics

For all statistical analyses, confirm that the following items are present in the figure legend, table legend, main text, or Methods section.

- n/a
- Confirmed
  - The exact sample size ( $n$ ) for each experimental group/condition, given as a discrete number and unit of measurement
  - A statement on whether measurements were taken from distinct samples or whether the same sample was measured repeatedly
  - The statistical test(s) used AND whether they are one- or two-sided  
*Only common tests should be described solely by name; describe more complex techniques in the Methods section.*
  - A description of all covariates tested
  - A description of any assumptions or corrections, such as tests of normality and adjustment for multiple comparisons
  - 
  - A full description of the statistical parameters including central tendency (e.g. means) or other basic estimates (e.g. regression coefficient) AND variation (e.g. standard deviation) or associated estimates of uncertainty (e.g. confidence intervals)
    - For null hypothesis testing, the test statistic (e.g.  $F$ ,  $t$ ,  $r$ ) with confidence intervals, effect sizes, degrees of freedom and  $P$  value noted  
*Give  $P$  values as exact values whenever suitable.*
    - For Bayesian analysis, information on the choice of priors and Markov chain Monte Carlo settings
    - For hierarchical and complex designs, identification of the appropriate level for tests and full reporting of outcomes
    - Estimates of effect sizes (e.g. Cohen's  $d$ , Pearson's  $r$ ), indicating how they were calculated

*Our web collection on statistics for biologists contains articles on many of the points above.*

### Software and code

Policy information about [availability of computer code](#)

Data collection

Data analysis

For manuscripts utilizing custom algorithms or software that are central to the research but not yet described in published literature, software must be made available to editors and reviewers. We strongly encourage code deposition in a community repository (e.g. GitHub). See the Nature Portfolio [guidelines for submitting code & software](#) for further information.

### Data

Policy information about [availability of data](#)

All manuscripts must include a [data availability statement](#). This statement should provide the following information, where applicable:

- Accession codes, unique identifiers, or web links for publicly available datasets
- A description of any restrictions on data availability
- For clinical datasets or third party data, please ensure that the statement adheres to our [policy](#)

All the single cell RNAseq data generated in this study can be accessed via European Genome-Phenome Archive (EGA) under accession number EGAD50000000543 [https://ega-archive.org/datasets/EGAD50000000543]. Spectral flow cytometry files have been deposited in FlowRepository under accession code FR-FCM-Z8F8 [http://flowrepository.org/id/FR-FCM-Z8F8]. The Whole Exome Sequencing (WES) data are not publicly available due to ethical and privacy regulations. Access to the data can be granted upon request by contacting the corresponding authors. Requests for access will be reviewed and responded to within 20 days and any approved

## Research involving human participants, their data, or biological material

Policy information about studies with [human participants or human data](#). See also policy information about [sex, gender \(identity/presentation\), and sexual orientation](#) and [race, ethnicity and racism](#).

|                                                                    |                                                                                                                                  |
|--------------------------------------------------------------------|----------------------------------------------------------------------------------------------------------------------------------|
| Reporting on sex and gender                                        | Only sex and not gender information was included in the study. Females and males were equally represented in the different       |
| Reporting on race, ethnicity, or other socially relevant groupings | NA                                                                                                                               |
| Population characteristics                                         | All population information is available in Supp. Table 1a.                                                                       |
| Recruitment                                                        | Human blood samples were collected from COVID patients as previously diagnosed according to the European society of immune       |
| Ethics oversight                                                   | All donors received oral and written information about the possibility that their blood would be used for research purposes, and |

Note that full information on the approval of the study protocol must also be provided in the manuscript.

## Field-specific reporting

Please select the one below that is the best fit for your research. If you are not sure, read the appropriate sections before making your selection.

- Life sciences       Behavioural & social sciences       Ecological, evolutionary & environmental sciences

## Life sciences study design

All studies must disclose on these points even when the disclosure is negative.

|                 |                                                                                                                                                     |
|-----------------|-----------------------------------------------------------------------------------------------------------------------------------------------------|
| Sample size     | No statistical methods were used to predetermine sample size. We followed standards in the field and Human Cell Atlas criteria.                     |
| Data exclusions | For the final count matrix, we excluded cells based on pre-established criteria for single-cells: we excluded low quality samples and contaminating |
| Replication     | Some of the most relevant findings in the nonCOVID 1 cohort were replicated in an additional cohort of nonCOVID patients. No replication using the  |
| Randomization   | The balance in sex and age covariates were tested in the two groups of comparison and non significant differences were found (Supp. Table 1b        |
| Blinding        | Blinding is not relevant for this study as the aim is describing differences between healthy donors and COVID patients.                             |

## Behavioural & social sciences study design

All studies must disclose on these points even when the disclosure is negative.

|                   |  |
|-------------------|--|
| Study description |  |
| Research sample   |  |
| Sampling strategy |  |
| Data collection   |  |
| Timing            |  |
| Data exclusions   |  |
| Non-participation |  |
| Randomization     |  |

## Ecological, evolutionary & environmental sciences study design

All studies must disclose on these points even when the disclosure is negative.

|                          |  |
|--------------------------|--|
| Study description        |  |
| Research sample          |  |
| Sampling strategy        |  |
| Data collection          |  |
| Timing and spatial scale |  |

|                 |                      |
|-----------------|----------------------|
| Data exclusions | <input type="text"/> |
| Reproducibility | <input type="text"/> |
| Randomization   | <input type="text"/> |
| Blinding        | <input type="text"/> |

Did the study involve field work?  Yes  No

## Field work, collection and transport

|                        |                      |
|------------------------|----------------------|
| Field conditions       | <input type="text"/> |
| Location               | <input type="text"/> |
| Access & import/export | <input type="text"/> |
| Disturbance            | <input type="text"/> |

## Reporting for specific materials, systems and methods

We require information from authors about some types of materials, experimental systems and methods used in many studies. Here, indicate whether each material, system or method listed is relevant to your study. If you are not sure if a list item applies to your research, read the appropriate section before selecting a response.

| Materials & experimental systems                               | Methods                                                 |
|----------------------------------------------------------------|---------------------------------------------------------|
| n/a                                                            | n/a                                                     |
| Involvement in the study                                       | Involvement in the study                                |
| <input checked="" type="radio"/> Antibodies                    | <input checked="" type="radio"/> ChIP-seq               |
| <input checked="" type="radio"/> Eukaryotic cell lines         | <input checked="" type="radio"/> Flow cytometry         |
| <input checked="" type="radio"/> Palaeontology and archaeology | <input checked="" type="radio"/> MRI-based neuroimaging |
| <input checked="" type="radio"/> Animals and other organisms   |                                                         |
| <input checked="" type="radio"/> Clinical data                 |                                                         |
| <input checked="" type="radio"/> Dual use research of concern  |                                                         |
| <input checked="" type="radio"/> Plants                        |                                                         |

### Antibodies

|                 |                                                                                                                                                               |
|-----------------|---------------------------------------------------------------------------------------------------------------------------------------------------------------|
| Antibodies used | <input type="text" value="CD11b-BB515 (BD, clone: ICRF44, Cat. No. 564518) Flow cytometry 1.25 ul:1M cells"/>                                                 |
| Validation      | <input type="text" value="CD11b-BB515 Flow cytometry (Routinely Tested). Flow cytometric analysis of CD11b expression on human peripheral blood leucocytes"/> |

### Eukaryotic cell lines

Policy information about [cell lines](#) and [Sex and Gender in Research](#)

|                                                                      |                      |
|----------------------------------------------------------------------|----------------------|
| Cell line source(s)                                                  | <input type="text"/> |
| Authentication                                                       | <input type="text"/> |
| Mycoplasma contamination                                             | <input type="text"/> |
| Commonly misidentified lines<br>(See <a href="#">ICLAC</a> register) | <input type="text"/> |

### Palaeontology and Archaeology

|                                                                                                                                                 |                      |
|-------------------------------------------------------------------------------------------------------------------------------------------------|----------------------|
| Specimen provenance                                                                                                                             | <input type="text"/> |
| Specimen deposition                                                                                                                             | <input type="text"/> |
| Dating methods                                                                                                                                  | <input type="text"/> |
| <input type="checkbox"/> Tick this box to confirm that the raw and calibrated dates are available in the paper or in Supplementary Information. |                      |
| Ethics oversight                                                                                                                                | <input type="text"/> |

Note that full information on the approval of the study protocol must also be provided in the manuscript.

## Animals and other research organisms

Policy information about [studies involving animals](#); [ARRIVE guidelines](#) recommended for reporting animal research, and [Sex and Gender in Research](#)

|                         |                      |
|-------------------------|----------------------|
| Laboratory animals      | <input type="text"/> |
| Wild animals            | <input type="text"/> |
| Reporting on sex        | <input type="text"/> |
| Field-collected samples | <input type="text"/> |
| Ethics oversight        | <input type="text"/> |

Note that full information on the approval of the study protocol must also be provided in the manuscript.

## Clinical data

Policy information about [clinical studies](#)

All manuscripts should comply with the ICMJE [guidelines for publication of clinical research](#) and a completed [CONSORT checklist](#) must be included with all submissions.

|                             |                      |
|-----------------------------|----------------------|
| Clinical trial registration | <input type="text"/> |
| Study protocol              | <input type="text"/> |
| Data collection             | <input type="text"/> |
| Outcomes                    | <input type="text"/> |

## Dual use research of concern

Policy information about [dual use research of concern](#)

### Hazards

Could the accidental, deliberate or reckless misuse of agents or technologies generated in the work, or the application of information presented in the manuscript, pose a threat to:

| No                    | Yes                                                         |
|-----------------------|-------------------------------------------------------------|
| <input type="radio"/> | <input checked="" type="radio"/> Public health              |
| <input type="radio"/> | <input checked="" type="radio"/> National security          |
| <input type="radio"/> | <input checked="" type="radio"/> Crops and/or livestock     |
| <input type="radio"/> | <input checked="" type="radio"/> Ecosystems                 |
| <input type="radio"/> | <input checked="" type="radio"/> Any other significant area |

### Experiments of concern

Does the work involve any of these experiments of concern:

| No                    | Yes                                                                                                          |
|-----------------------|--------------------------------------------------------------------------------------------------------------|
| <input type="radio"/> | <input checked="" type="radio"/> Demonstrate how to render a vaccine ineffective                             |
| <input type="radio"/> | <input checked="" type="radio"/> Confer resistance to therapeutically useful antibiotics or antiviral agents |
| <input type="radio"/> | <input checked="" type="radio"/> Enhance the virulence of a pathogen or render a nonpathogen virulent        |
| <input type="radio"/> | <input checked="" type="radio"/> Increase transmissibility of a pathogen                                     |
| <input type="radio"/> | <input checked="" type="radio"/> Alter the host range of a pathogen                                          |
| <input type="radio"/> | <input checked="" type="radio"/> Enable evasion of diagnostic/detection modalities                           |
| <input type="radio"/> | <input checked="" type="radio"/> Enable the weaponization of a biological agent or toxin                     |
| <input type="radio"/> | <input checked="" type="radio"/> Any other potentially harmful combination of experiments and agents         |

## Plants

|                       |                      |
|-----------------------|----------------------|
| Seed stocks           | <input type="text"/> |
| Novel plant genotypes | <input type="text"/> |
| Authentication        | <input type="text"/> |

## ChIP-seq

### Data deposition

- Confirm that both raw and final processed data have been deposited in a public database such as [GEO](#).
- Confirm that you have deposited or provided access to graph files (e.g. BED files) for the called peaks.

|                                                                    |                      |
|--------------------------------------------------------------------|----------------------|
| Data access links<br><i>May remain private before publication.</i> | <input type="text"/> |
| Files in database submission                                       | <input type="text"/> |
| Genome browser session<br>(e.g. <a href="#">UCSC</a> )             | <input type="text"/> |

### Methodology

|                         |                      |
|-------------------------|----------------------|
| Replicates              | <input type="text"/> |
| Sequencing depth        | <input type="text"/> |
| Antibodies              | <input type="text"/> |
| Peak calling parameters | <input type="text"/> |
| Data quality            | <input type="text"/> |
| Software                | <input type="text"/> |

## Flow Cytometry

### Plots

Confirm that:

- The axis labels state the marker and fluorochrome used (e.g. CD4-FITC).
- The axis scales are clearly visible. Include numbers along axes only for bottom left plot of group (a 'group' is an analysis of identical markers).
- All plots are contour plots with outliers or pseudocolor plots.
- A numerical value for number of cells or percentage (with statistics) is provided.

### Methodology

|                           |                                                                                                                                                              |
|---------------------------|--------------------------------------------------------------------------------------------------------------------------------------------------------------|
| Sample preparation        | <input type="text" value="PBMCs were obtained from peripheral blood by Ficoll gradient using Lymphocyte Isolation Solution. One million PBMCs were"/>        |
| Instrument                | <input type="text" value="Cells were acquired on a Cytex Aurora 5-laser spectral flow cytometer."/>                                                          |
| Software                  | <input type="text" value="Spectral cytometry analysis were performed using FlowJo v.10.10. For the UMAP and Phenograph clustering (FlowJo plugins),"/>       |
| Cell population abundance | <input type="text" value="NA"/>                                                                                                                              |
| Gating strategy           | <input type="text" value="For initial gating viability, SSC-A/FSC-A doublets, and cell-lineage markers (CD3, CD4, CD8, CD56 in NK+T cell panel, and CD19,"/> |

Tick this box to confirm that a figure exemplifying the gating strategy is provided in the Supplementary Information.

## Magnetic resonance imaging

### Experimental design

|             |                      |
|-------------|----------------------|
| Design type | <input type="text"/> |
|-------------|----------------------|

Design specifications

Behavioral performance measures

### Acquisition

Imaging type(s)

Field strength

Sequence & imaging parameters

Area of acquisition

Diffusion MRI  Used  Not used

### Preprocessing

Preprocessing software

Normalization

Normalization template

Noise and artifact removal

Volume censoring

### Statistical modeling & inference

Model type and settings

Effect(s) tested

Specify type of analysis:  Whole brain  ROI-based  Both

Statistic type for inference

(See [Eklund et al. 2016](#) )

Correction

### Models & analysis

$\frac{n}{a}$

Included in the study

Functional and/or effective connectivity

Graph analysis

Multivariate modeling or predictive analysis

Functional and/or effective connectivity

Graph analysis

Multivariate modeling and predictive analysis
